# Supplementary material for: Functional Characterization of Porcine NK-Lysin: A Novel Immunomodulator That Regulates Intestinal Inflammatory Response
Source: MDPI journal article supplement (doi:10.3390/molecules26144242), 2021-07-13

**Additional file:**

**Fig. S1 Strategy of cloning of PNKL gene.**

The CDS sequence without signal peptide of PNKL was cloned, *EcoR* I and *Not*I was insert in 5' and 3' respectively.

***EcoR* I**

***GAATTC***CCAGGGCTGGCCTTTTCCGGTCTGACCCCTGAGCA  
CTCTGCCCTGGCAAGGGCCCACCCATGCGACGGAGAGCAG  
TTCTGCCAGAACCTGGCCCCGGAGGACCCCCAGGGTGACC  
AGCTGCTCCAAAGAGAGGAGCTGGGCCTCATCTGTGAGTCT  
TGTCGGAAGATAATCCAGAAGCTGGAGGACATGGTGGGACC  
ACAACCCAACGAGGACACTGTCACCCAGGCAGCCTCCCGG  
GTGTGTGACAAGATGAAGATACTGAGAGGTGTGTGCAAGA  
AGATCATGAGGACCTTTTCTCCGTCGCATCTCCAAGGACATCC  
TGACTGGGAAGAAACCCCAGGCTATCTGTGTGGACATCAAG  
ATCTGTAAAGAGAAGACAGGTCTCATCTGA***GCGGCCGC***

***Not* I**

**Fig. S2 Results from agarose gel electrophoresis (EcoRI/Not I digestion map).**

A Digestion of the recombinant expression vectors. Lane M<sub>1</sub> DNA marker (DL 10 000), Lanes 1 PNKL (without digestion). Lanes 2 PNKL (digestion with EcoRI and NotI) Lane M<sub>2</sub> DNA marker (DL 2000). b RT-PCR of PNKL. Lane M DNA marker (DL 4000), Lanes 1-2 PNKL (production of five tubes of reaction solution).

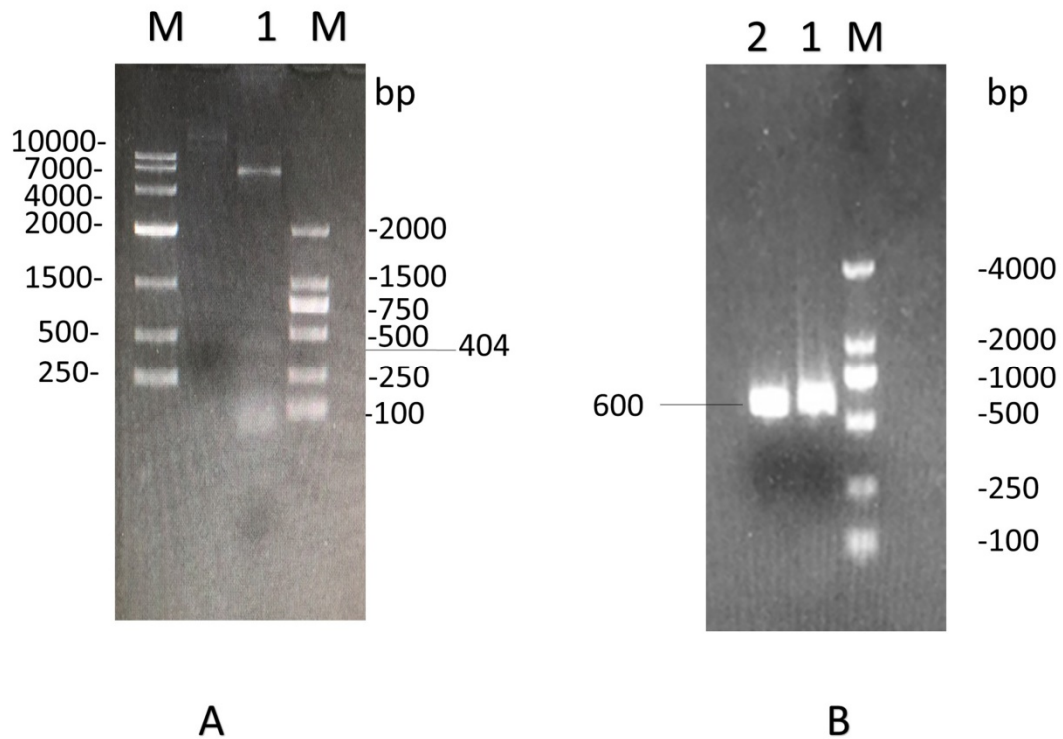

Supplement: s1 [file s1]
